# Supplementary material for: Anthocyanin Content and Fusarium Mycotoxins in Pigmented Wheat (Triticum aestivum L. spp. aestivum): An Open Field Evaluation
Source: MDPI journal article supplement (doi:10.3390/plants12040693), 2023-02-04
Supplement: s1 [file s1]

## Supplementary Files for:

Article

# Anthocyanin Content and *Fusarium* Mycotoxins in Pigmented Wheat (*Triticum aestivum* L. spp. *aestivum*): An Open Field Evaluation

Marco Gozzi <sup>1</sup>, Massimo Blandino <sup>2</sup>, Chiara Dall'Asta <sup>1</sup>, Petr Martinek <sup>3</sup>, Renato Bruni <sup>1,\*</sup> and Laura Righetti <sup>1,\*,†,‡</sup>

<sup>1</sup> Department of Food and Drug, University of Parma, Parco Area delle Scienze 27/a, 43100 Parma, Italy; marco.gozzi@unipr.it (M.G.); chiara.dallasta@unipr.it (C.D.)

<sup>2</sup> Department of Agricultural Forest and Food Sciences, University of Turin, Largo Paolo Braccini 2, 10095 Grugliasco, Italy; massimo.blandino@unito.it

<sup>3</sup> Agrotest Fyto, Ltd., Havlíčková 2787/121, 767 01 Kroměříž, Czech Republic; martinek@vukrom.cz

\* Correspondence: renato.bruni@unipr.it (R.B.); laura.righetti@wur.nl (L.R.)

† Present Address: Wageningen Food Safety Research, Wageningen University & Research, P.O. Box 230, 6700 AE Wageningen, The Netherlands. .

‡ Present Address: Laboratory of Organic Chemistry, Wageningen University, 6708 WE Wageningen, The Netherlands.

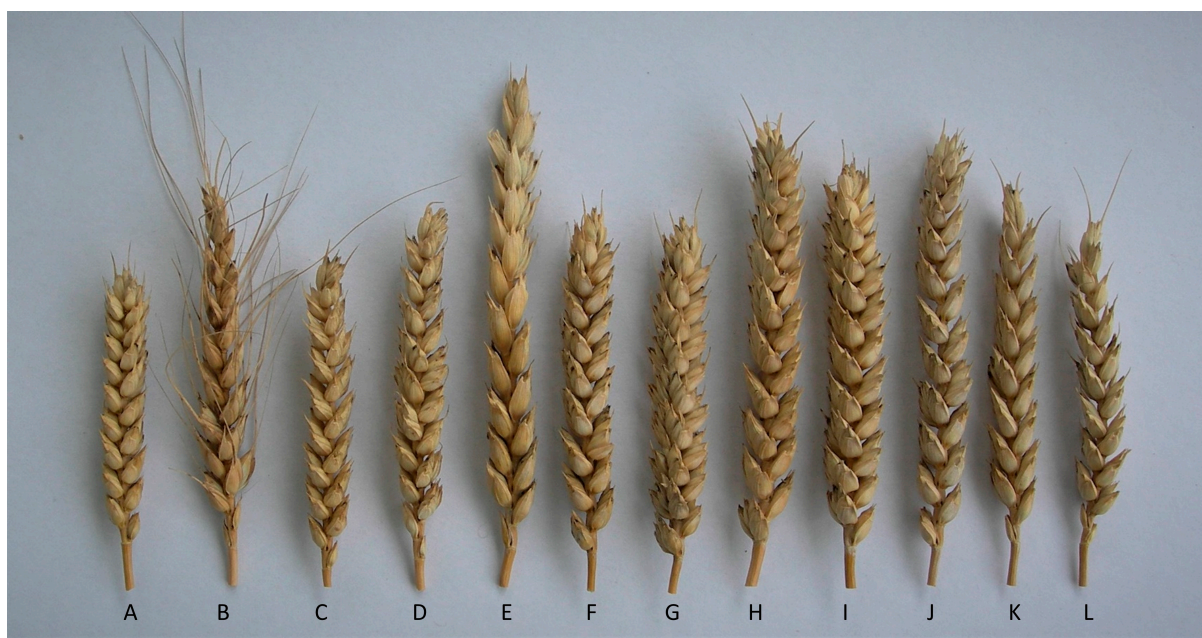

**Figure S1** : Appearance of ears of used varieties: A – Aubusson; B – Anthograin; C – Ceraso; D – AF Jumiko; E – KM 106-18 (with elongated glume transferred from *Triticum polonicum* L.); F – Merlot; G – Rosso; H – Skorpion; I – AF Oxana; J – KM 72-18; K – AF Zora; L – KM 98-18

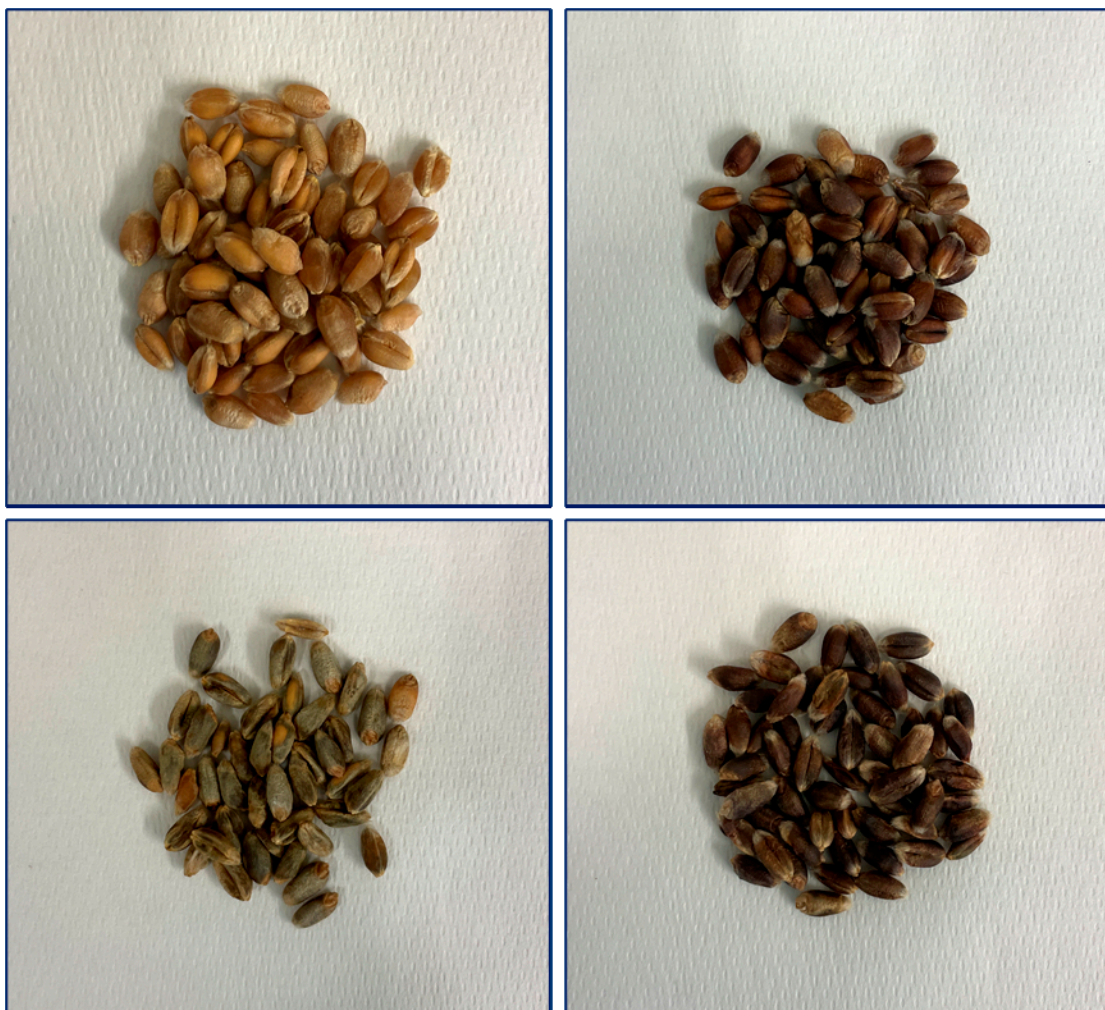

**Figure S2.** Appearance of grains of different colour selected between the cultivars /breeding lines considered in this study: Aubusson (top left), Merlot (top right), Skorpion (bottom left) and AF Zora (bottom right).
